# Supplementary material for: DNA barcoding a unique avifauna: an important tool for evolution, systematics and conservation
Source: Springer Nature journal article supplement (doi:10.1186/s12862-019-1346-y), 2019-02-11
Supplement: 12862_2019_1346_MOESM3_ESM.pdf [file 12862_2019_1346_MOESM3_ESM.pdf]

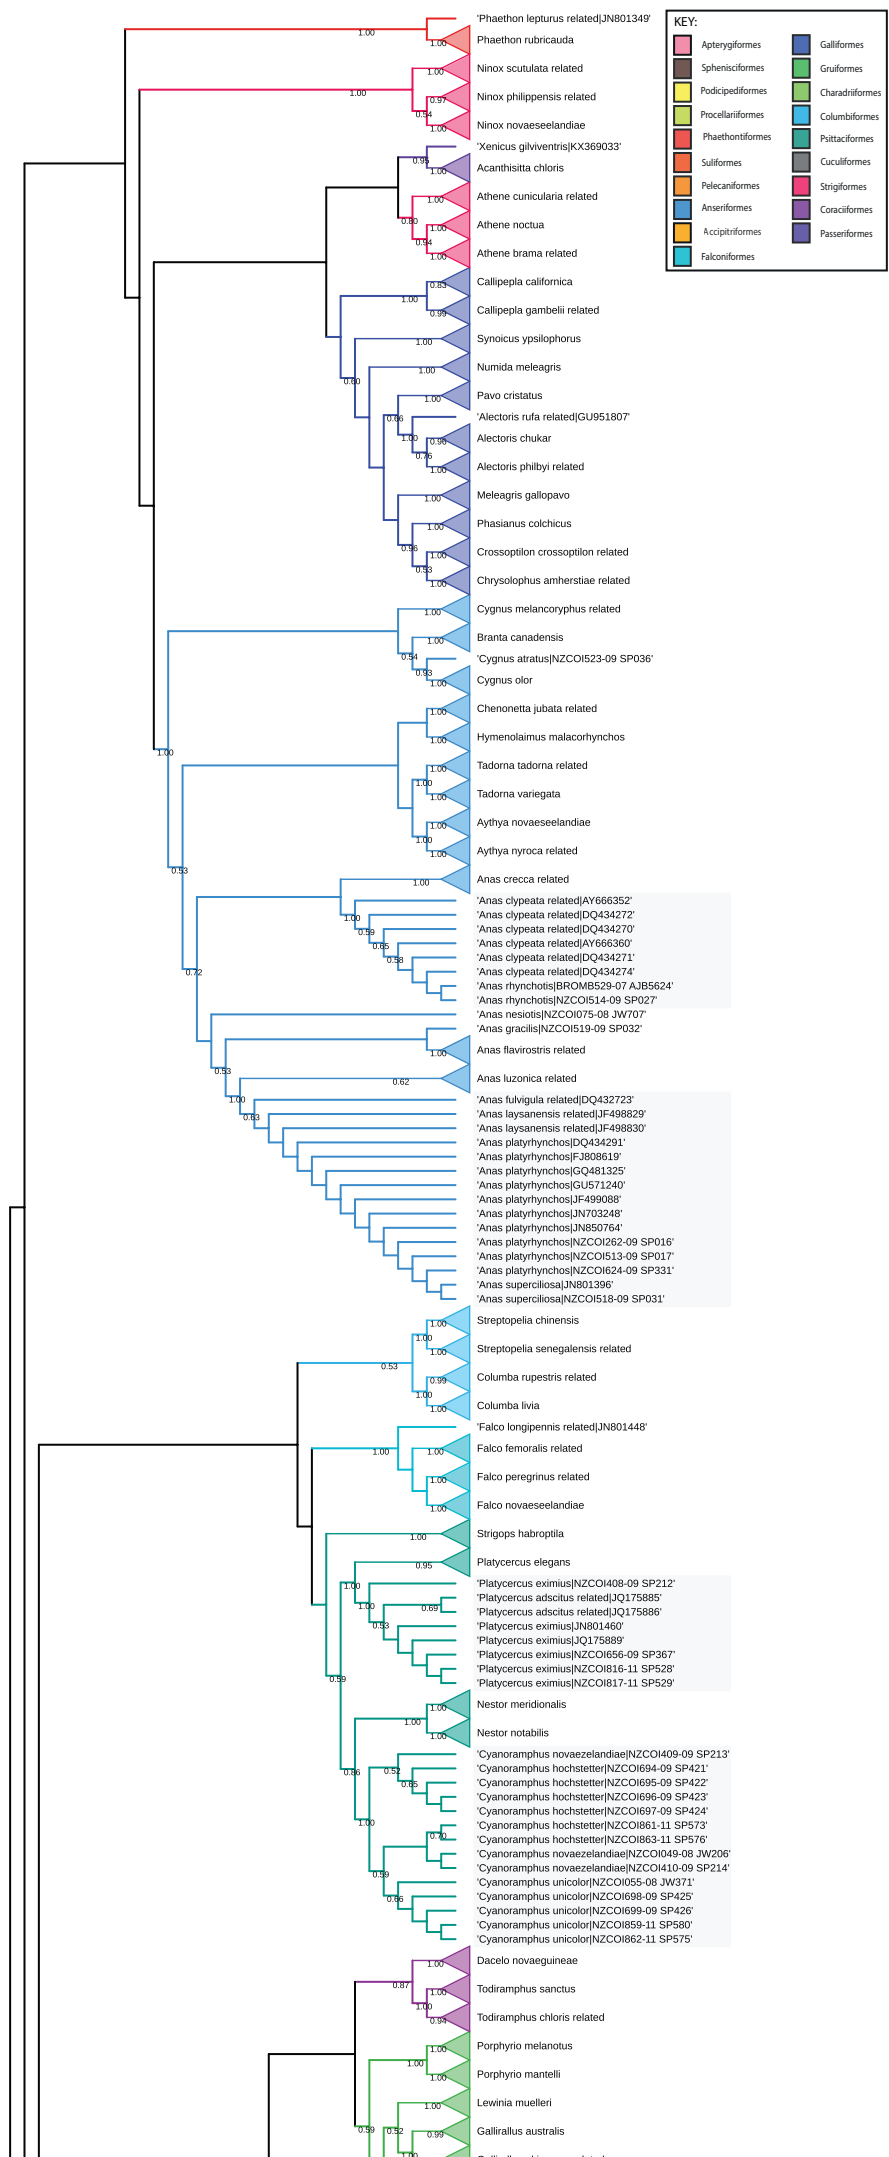

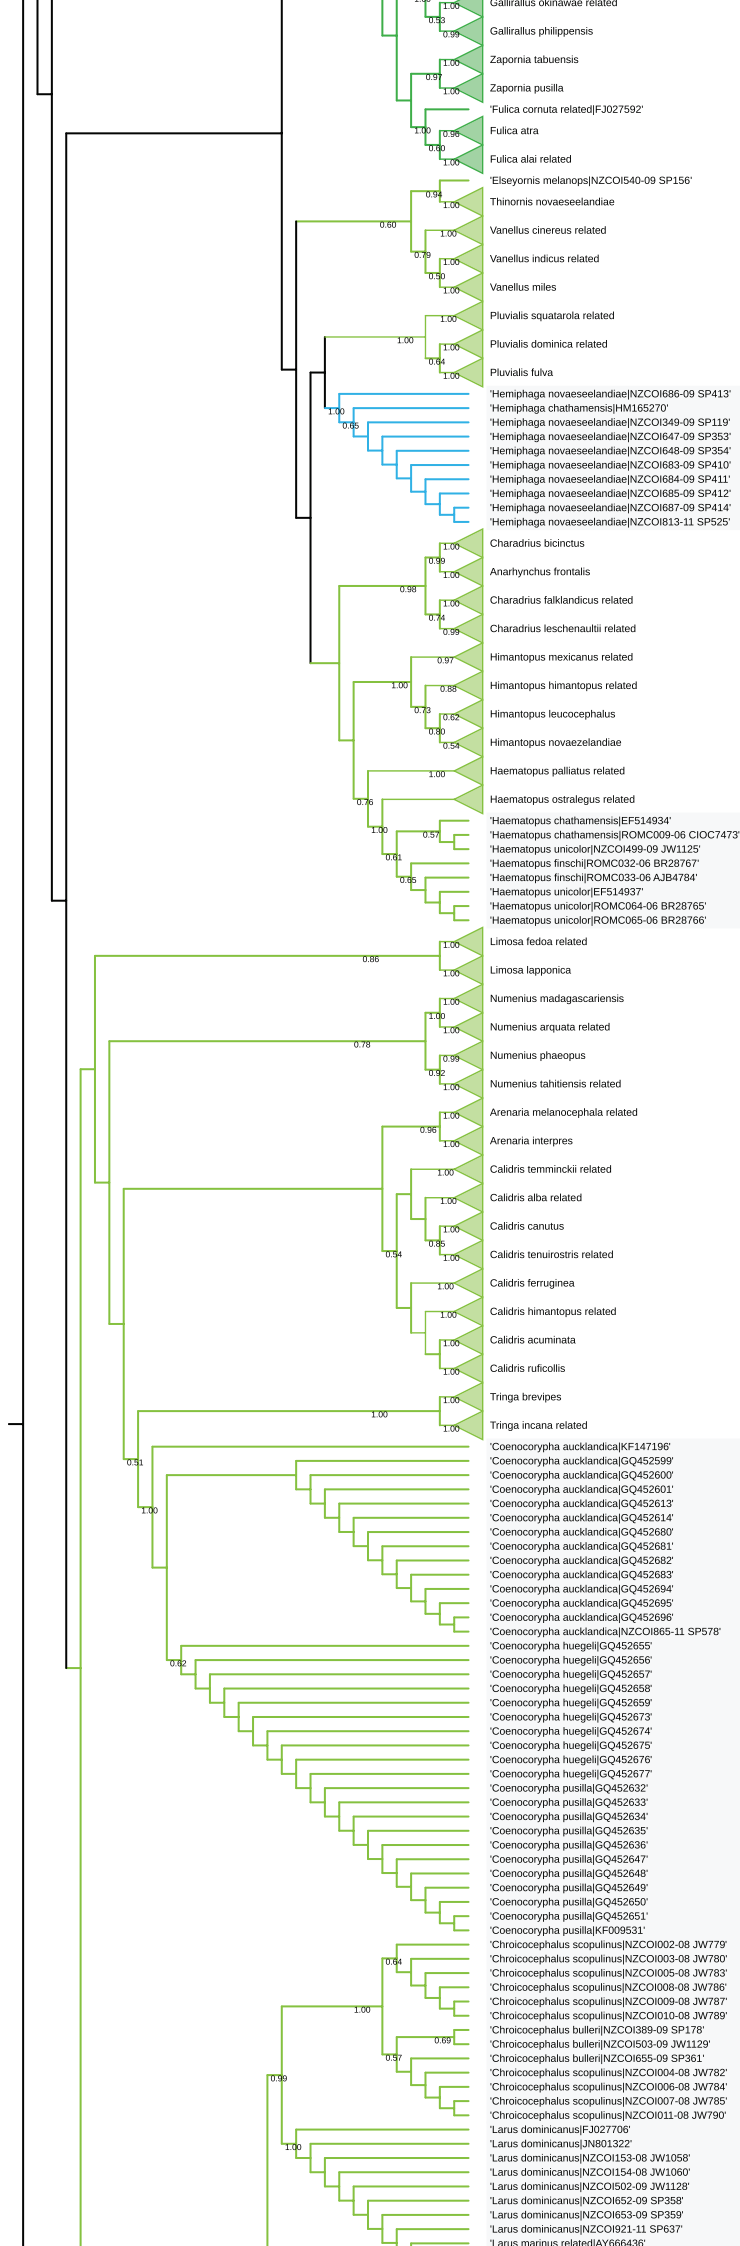

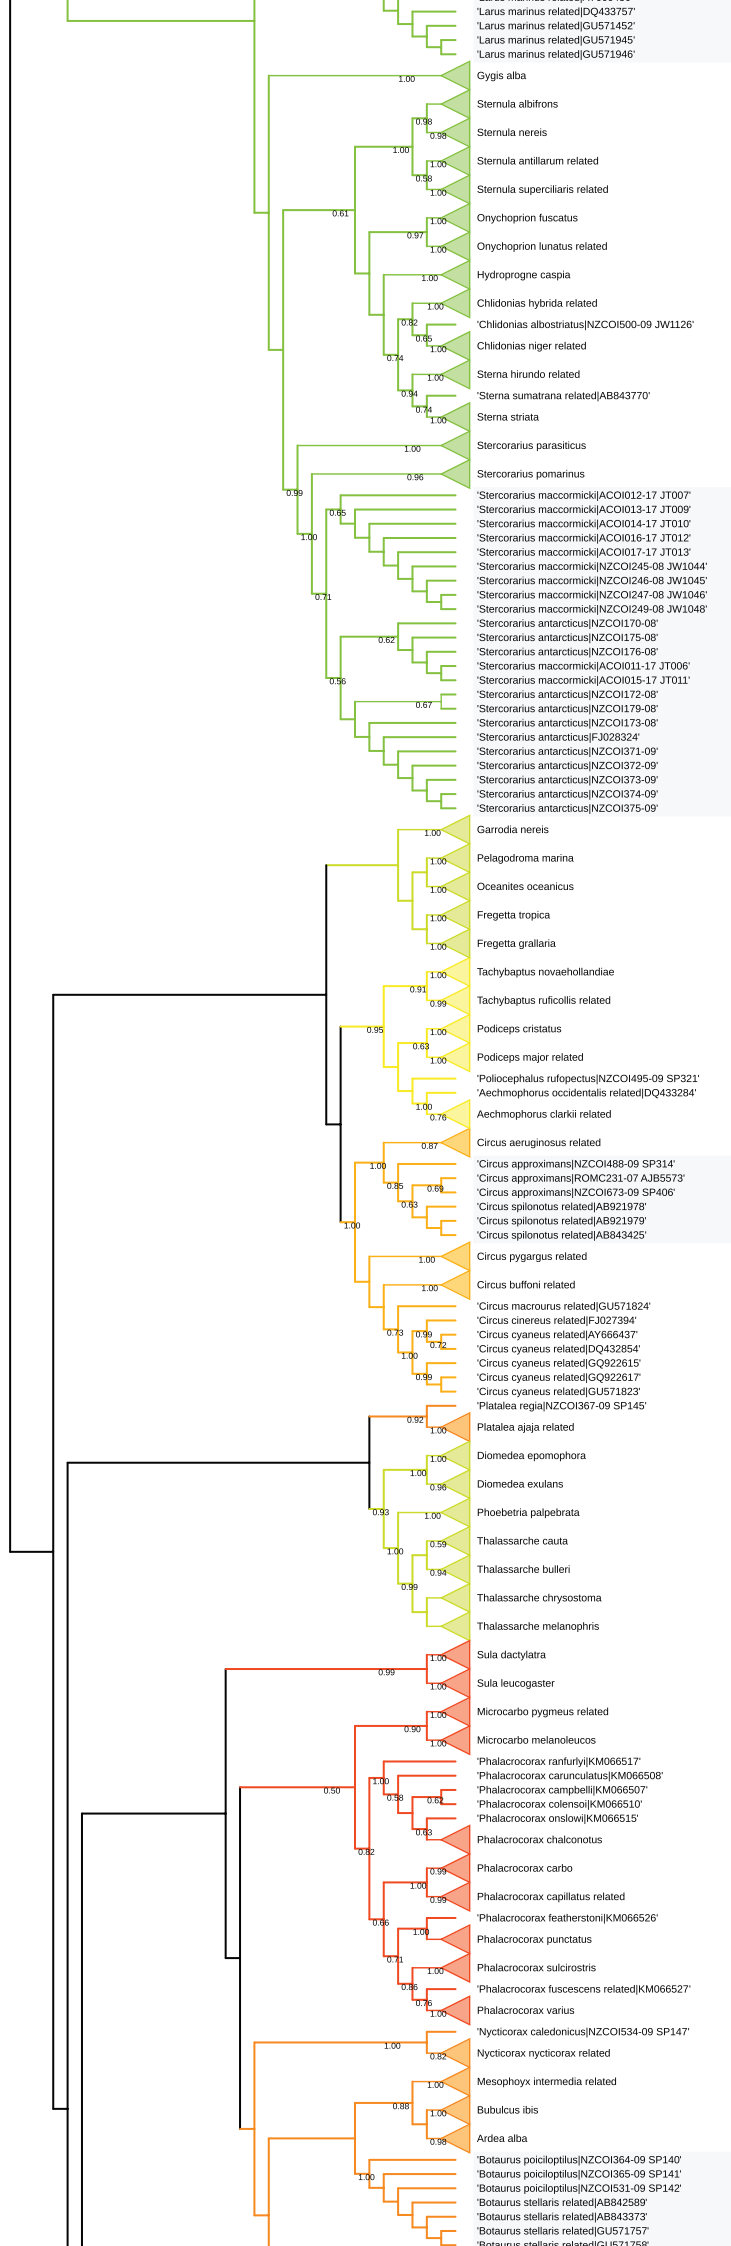

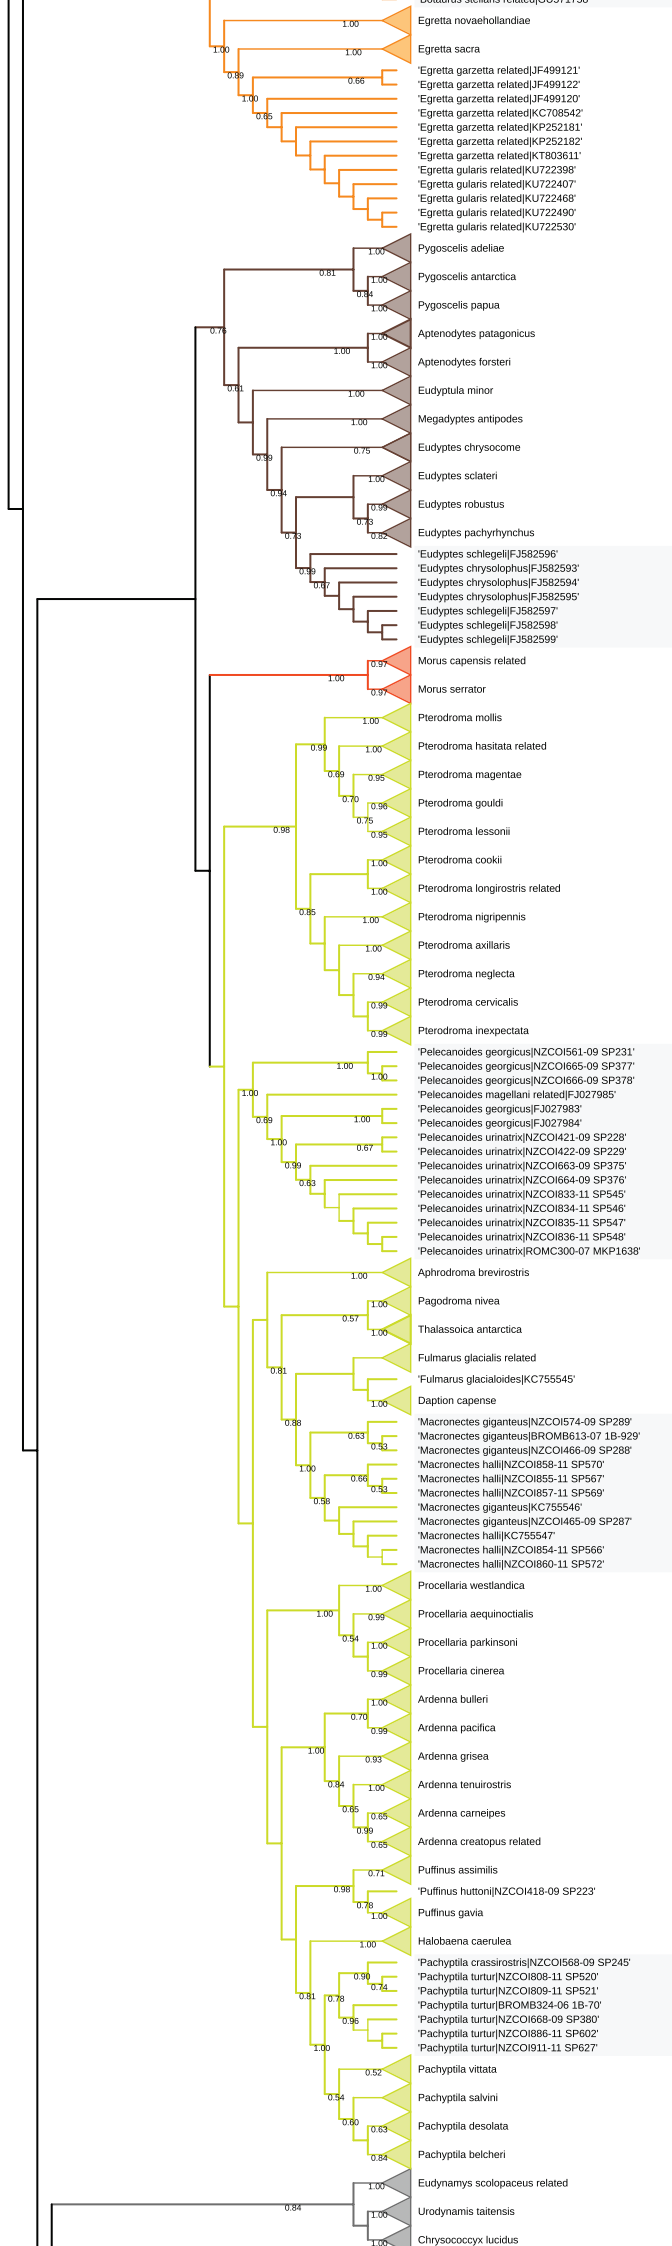

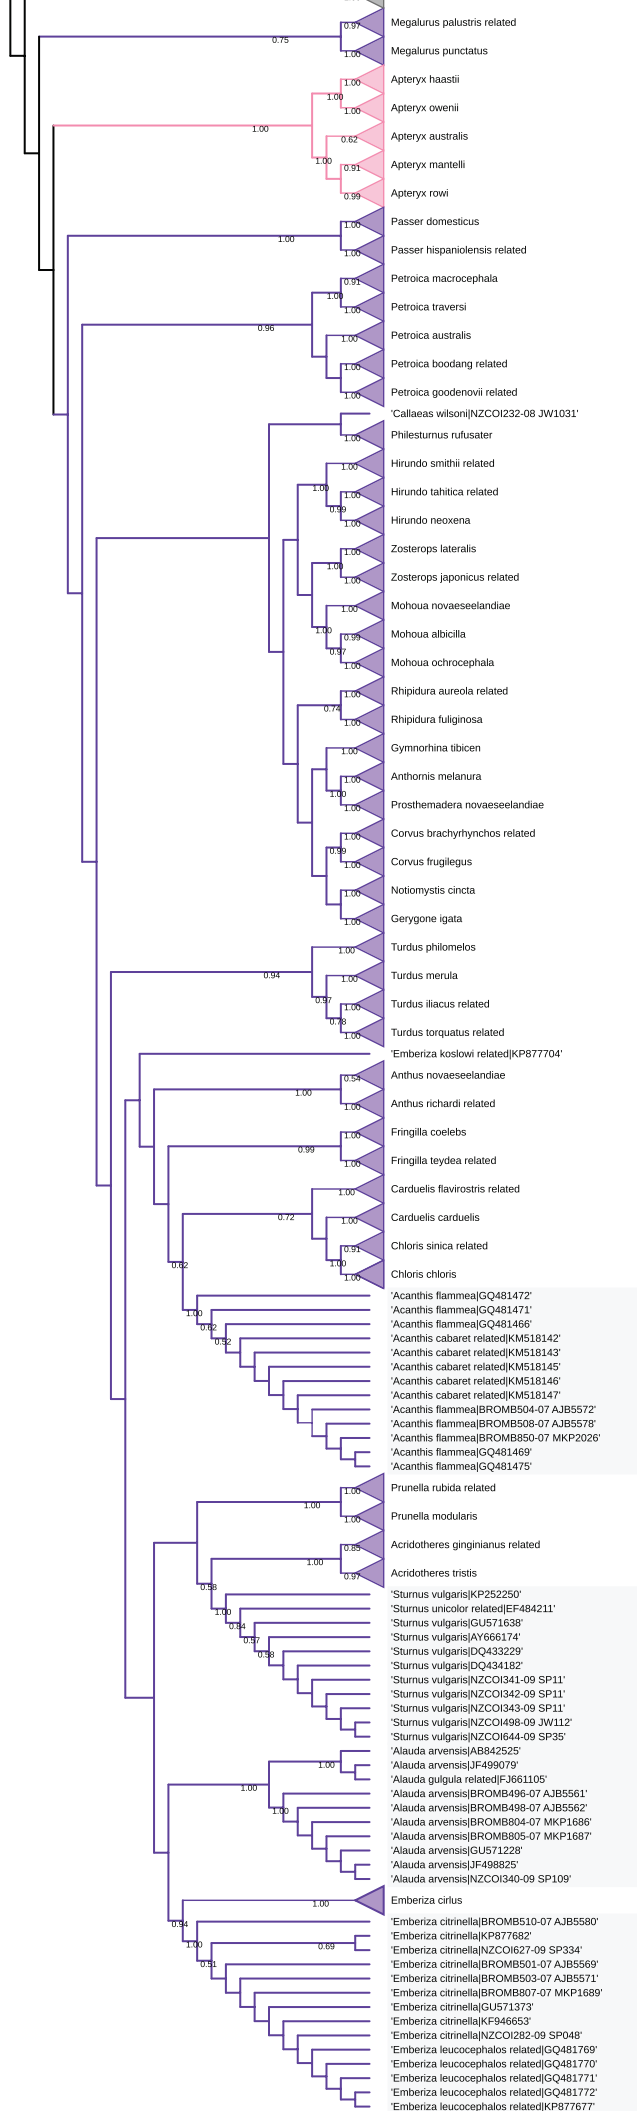

**Additional file 3: Figure S3.** Neighbour Joining tree of sequences of a standardised 648bp region of the cytochrome c oxidase gene obtained from New Zealand and closely related bird species in this study. Bootstrap support values  $\geq 0.5$  are indicated. Monophyletic clades have been collapsed. Grey shading indicates New Zealand species whose COI sequences did not form monophyletic clades. Branches are coloured by Order. Note that branch lengths do not reflect genetic distances.
